# Supplementary material for: Tumor B7-H3 (CD276) Expression and Survival in Pancreatic Cancer
Source: MDPI journal article supplement (doi:10.3390/jcm7070172), 2018-07-10
Supplement: s1 [file s1]

# Supplementary Materials: Tumor B7-H3 (CD276) Expression and Survival in Pancreatic Cancer

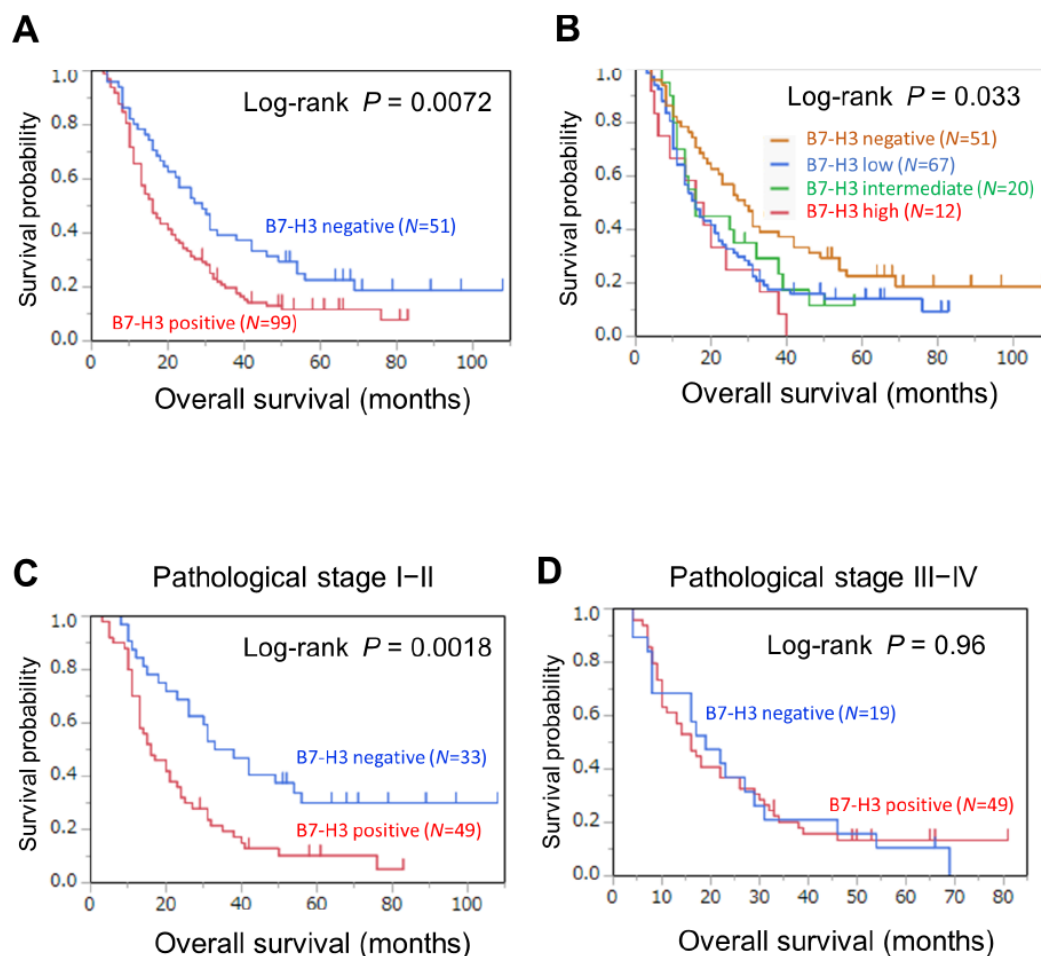

**Figure S1.** The following is available online at [www.mdpi.com/link](http://www.mdpi.com/link), Figure S1: Kaplan-Meier curves for overall survival in patients with pancreatic cancer (A) according to tumor B7-H3 expression (negative or positive) or (B) according to tumor B7-H3 expression (negative, low, intermediate, or high). Kaplan-Meier curves for overall survival in patients with pancreatic cancer according to tumor B7-H3 expression (negative or positive) in strata of pathological stage. (C) Pathological stage I – II. (D) Pathological stage III–IV.
